# Supplementary material for: Overview of Native Chicken Breeds in Italy: Conservation Status and Rearing Systems in Use
Source: MDPI journal article supplement (doi:10.3390/ani11020490), 2021-02-12
Supplement: s1 [file s1]

# Tables S

**Supplementary Materials:** Table S1: Manpower involved in the care and management of flocks: responses from all breeders and divided according to breeder category, Table S2: Environmental housing conditions adopted: responses from all breeders and divided according to breeder category, Table S3: Pen cover and ground vegetation: responses from all breeders and divided according to breeder category, Table S4: Litter management: responses from all breeders and divided according to breeder category, Table S5: Pen furnishings: responses from all breeders and divided according to breeder category, Table S6: Self-production of feed primary materials: responses from all breeders and divided according to breeder category, Table S7: Flock vaccinations and medical treatments performed: responses from all breeders and divided according to breeder category, Table S8: Farm location and presence of a cold storage room for dead animals: responses from all breeders and divided according to breeder category, Table S9: Frequency of interventions against rodents: responses from all breeders and divided according to breeder category.

**Table S1.** Manpower involved in the care and management of flocks: responses from all breeders and divided according to breeder category.

| Variable                            | All Breeders     |    | Farmers         |    | Fancy Breeders  |     | $\chi^2$ <sup>1</sup> |
|-------------------------------------|------------------|----|-----------------|----|-----------------|-----|-----------------------|
|                                     | n                | %  | n               | %  | n               | %   |                       |
| Employees                           | (n = 105)        |    | (n = 72)        |    | (n = 33)        |     |                       |
| Family members                      | 80 <sup>A</sup>  | 77 | 48 <sup>A</sup> | 67 | 32 <sup>A</sup> | 97  | **                    |
| External personnel                  | 11 <sup>B</sup>  | 10 | 10 <sup>B</sup> | 14 | 1 <sup>B</sup>  | 3   | NS                    |
| Family members + external personnel | 14 <sup>B</sup>  | 13 | 14 <sup>B</sup> | 19 | 0 <sup>B</sup>  | 0   | **                    |
| Family members (n)                  | (n = 78)         |    | (n = 57)        |    | (n = 21)        |     |                       |
| < than 5                            | 74 <sup>A</sup>  | 95 | 53 <sup>A</sup> | 93 | 21 <sup>A</sup> | 100 | NS                    |
| 5 or more                           | 4 <sup>B</sup>   | 5  | 4 <sup>B</sup>  | 7  | 0 <sup>B</sup>  | 0   | NS                    |
| External personnel (n)              | (n = 25)         |    | (n = 24)        |    | (n = 1)         |     |                       |
| < than 5                            | 15 <sup>A</sup>  | 60 | 15 <sup>A</sup> | 63 | 0               | 0   | NS                    |
| Between 5 - 10                      | 8 <sup>A,B</sup> | 32 | 7 <sup>B</sup>  | 29 | 1               | 100 | NS                    |
| > than 10                           | 2 <sup>B</sup>   | 8  | 2 <sup>B</sup>  | 8  | 0               | 0   | NS                    |

<sup>1</sup> Chi square test for a single variable between the two breeder categories, i.e. within row comparisons; significance levels: \*\*  $p < 0.01$ ; NS, non-significant ( $p > 0.05$ ). <sup>A-B</sup> Observations with different superscripts within the column are significantly different ( $\chi^2$ -test  $p < 0.01$ ).

**Table S2.** Environmental housing conditions adopted: responses from all breeders and divided according to breeder category.

| Variable                 | All Breed-ers   |    | Farmers         |    | Fancy Breeders  |     | $\chi^2$ <sup>1</sup> |
|--------------------------|-----------------|----|-----------------|----|-----------------|-----|-----------------------|
|                          | n               | %  | n               | %  | n               | %   |                       |
| Heating system           | (n = 77)        |    | (n = 62)        |    | (n = 15)        |     |                       |
| Yes                      | 38              | 49 | 36              | 58 | 2 <sup>B</sup>  | 13  | **                    |
| No                       | 39              | 51 | 26              | 42 | 13 <sup>A</sup> | 87  | **                    |
| Cooling system           | (n = 77)        |    | (n = 62)        |    | (n = 15)        |     |                       |
| Yes                      | 2 <sup>B</sup>  | 3  | 2 <sup>B</sup>  | 3  | 0 <sup>B</sup>  | 0   | NS                    |
| No                       | 75 <sup>A</sup> | 97 | 60 <sup>A</sup> | 97 | 15 <sup>A</sup> | 100 | NS                    |
| Ventilation system       | (n = 77)        |    | (n = 62)        |    | (n = 15)        |     |                       |
| Environmental conditions | 73 <sup>A</sup> | 95 | 58 <sup>A</sup> | 94 | 15 <sup>A</sup> | 100 | NS                    |
| Forced air system        | 0 <sup>B</sup>  | 0  | 0 <sup>B</sup>  | 0  | 0 <sup>B</sup>  | 0   | NS                    |
| Combined system          | 4 <sup>B</sup>  | 5  | 4 <sup>B</sup>  | 6  | 0 <sup>B</sup>  | 0   | NS                    |
| Lighting system          | (n = 77)        |    | (n = 62)        |    | (n = 14)        |     |                       |
| Environmental conditions | 60 <sup>A</sup> | 78 | 48 <sup>A</sup> | 78 | 12 <sup>A</sup> | 86  | NS                    |
| Artificial lighting      | 2 <sup>C</sup>  | 3  | 2 <sup>C</sup>  | 3  | 0 <sup>B</sup>  | 0   | NS                    |
| Combined system          | 14 <sup>B</sup> | 18 | 12 <sup>B</sup> | 19 | 2 <sup>B</sup>  | 14  | NS                    |
| Temperature measurement  | (n = 77)        |    | (n = 62)        |    | (n = 15)        |     |                       |
| Yes                      | 6 <sup>B</sup>  | 8  | 5 <sup>B</sup>  | 8  | 1 <sup>B</sup>  | 7   | NS                    |
| No                       | 71 <sup>A</sup> | 92 | 57 <sup>A</sup> | 92 | 14 <sup>A</sup> | 93  | NS                    |
| RH measurement           | (n = 77)        |    | (n = 62)        |    | (n = 15)        |     |                       |
| Yes                      | 4 <sup>B</sup>  | 5  | 3 <sup>B</sup>  | 5  | 1 <sup>B</sup>  | 7   | NS                    |
| No                       | 73 <sup>A</sup> | 95 | 59 <sup>A</sup> | 95 | 14 <sup>A</sup> | 93  | NS                    |
| Air quality measurement  | (n = 77)        |    | (n = 62)        |    | (n = 15)        |     |                       |
| Yes                      | 1 <sup>B</sup>  | 1  | 1 <sup>B</sup>  | 2  | 0 <sup>B</sup>  | 0   | NS                    |
| No                       | 76 <sup>A</sup> | 99 | 61 <sup>A</sup> | 98 | 15 <sup>A</sup> | 100 | NS                    |

<sup>1</sup> Chi square test for a single variable between the two breeder categories, i.e. within row comparisons; significance levels: \*\*  $p < 0.01$ ; NS, non-significant ( $p > 0.05$ ). <sup>A-C</sup> Observations with different superscripts within the column are significantly different ( $\chi^2$ -test  $p < 0.01$ ).

**Table S3.** Pen cover and ground vegetation: responses from all breeders and divided according to breeder category.

| Variable                 | All Breeders    |    | Farmers         |    | Fancy Breeders   |    | $\chi^2$ <sup>1</sup> |
|--------------------------|-----------------|----|-----------------|----|------------------|----|-----------------------|
|                          | n               | %  | n               | %  | n                | %  |                       |
| Cover                    | (n = 105)       |    | (n = 68)        |    | (n = 37)         |    |                       |
| Yes                      | 45              | 43 | 21 <sup>B</sup> | 31 | 24 <sup>a</sup>  | 65 | **                    |
| No                       | 60              | 57 | 47 <sup>A</sup> | 69 | 13 <sup>b</sup>  | 35 | **                    |
| Cover material           | (n = 23)        |    | (n = 15)        |    | (n = 8)          |    |                       |
| Netting                  | 9 <sup>A</sup>  | 39 | 9 <sup>A</sup>  | 60 | 0 <sup>B</sup>   | 0  | **                    |
| Fabric canopy            | 12 <sup>A</sup> | 52 | 6 <sup>A</sup>  | 40 | 6 <sup>A</sup>   | 75 | NS                    |
| Netting & fabric canopy  | 2 <sup>B</sup>  | 9  | 0 <sup>B</sup>  | 0  | 2 <sup>A,B</sup> | 25 | NS                    |
| Vegetation               | (n = 87)        |    | (n = 59)        |    | (n = 28)         |    |                       |
| Meadow                   | 14 <sup>B</sup> | 16 | 11 <sup>B</sup> | 19 | 3 <sup>B,C</sup> | 11 | NS                    |
| Bushes                   | 3 <sup>C</sup>  | 3  | 3 <sup>C</sup>  | 5  | 0 <sup>C</sup>   | 0  | NS                    |
| Trees                    | 30 <sup>A</sup> | 35 | 22 <sup>A</sup> | 37 | 8 <sup>A,B</sup> | 28 | NS                    |
| Combination of the above | 40 <sup>A</sup> | 46 | 23 <sup>A</sup> | 39 | 17 <sup>A</sup>  | 61 | NS                    |
| Type of meadow           | (n = 51)        |    | (n = 34)        |    | (n = 17)         |    |                       |
| Perennial                | 18 <sup>A</sup> | 35 | 12 <sup>A</sup> | 35 | 6 <sup>A</sup>   | 35 | NS                    |
| Polyphyletic             | 27 <sup>A</sup> | 53 | 18 <sup>A</sup> | 53 | 9 <sup>A</sup>   | 53 | NS                    |
| Graminaceous             | 3 <sup>B</sup>  | 6  | 1 <sup>B</sup>  | 3  | 2 <sup>A,B</sup> | 12 | NS                    |
| Alfalfa                  | 3 <sup>B</sup>  | 6  | 3 <sup>B</sup>  | 9  | 0 <sup>B</sup>   | 0  | NS                    |

<sup>1</sup> Chi square test for a single variable between the two breeder categories, i.e. within row comparisons; significance levels: \*\*  $p < 0.01$ ; NS, non-significant ( $p > 0.05$ ). <sup>A-C</sup> Observations with different superscripts within the column are significantly different ( $\chi^2$ -test  $p < 0.01$ ). <sup>a-b</sup> Observations with different superscripts within the column are significantly different ( $\chi^2$ -test,  $p < 0.05$ ).

**Table S4.** Litter management: responses from all breeders and divided according to breeder category.

| Variable                | All Breeders    |    | Farmers         |    | Fancy Breeders  |    | $\chi^2$ <sup>1</sup> |
|-------------------------|-----------------|----|-----------------|----|-----------------|----|-----------------------|
|                         | n               | %  | n               | %  | n               | %  |                       |
| Addition of additives   | (n = 71)        |    | (n = 56)        |    | (n = 15)        |    |                       |
| Yes                     | 2 <sup>B</sup>  | 3  | 1 <sup>B</sup>  | 2  | 1 <sup>B</sup>  | 7  | NS                    |
| No                      | 69 <sup>A</sup> | 97 | 55 <sup>A</sup> | 98 | 14 <sup>A</sup> | 93 | NS                    |
| Flip over of the litter | (n = 70)        |    | (n = 56)        |    | (n = 14)        |    |                       |
| Yes                     | 11 <sup>B</sup> | 16 | 4 <sup>B</sup>  | 7  | 7               | 50 | **                    |
| No                      | 59 <sup>A</sup> | 84 | 52 <sup>A</sup> | 93 | 7               | 50 | **                    |

<sup>1</sup> Chi square test for a single variable between the two breeder categories, i.e. within row comparisons; significance levels: \*\*  $p < 0.01$ ; NS, non-significant ( $p > 0.05$ ). <sup>A-C</sup> Observations with different superscripts within the column are significantly different ( $\chi^2$ -test  $p < 0.01$ ).

**Table S5.** Pen furnishings: responses from all breeders and divided according to breeder category.

| Variable           | All Breeders     |    | Farmers         |    | Fancy Breeders  |    | $\chi^2$ <sup>1</sup> |
|--------------------|------------------|----|-----------------|----|-----------------|----|-----------------------|
|                    | n                | %  | n               | %  | n               | %  |                       |
| Water distribution | (n = 120)        |    | (n = 75)        |    | (n = 45)        |    |                       |
| Manual             | 84 <sup>A</sup>  | 70 | 53 <sup>A</sup> | 70 | 31 <sup>A</sup> | 69 | NS                    |
| Automatic          | 29 <sup>B</sup>  | 24 | 17 <sup>B</sup> | 23 | 12 <sup>B</sup> | 27 | NS                    |
| Both               | 7 <sup>C</sup>   | 6  | 5 <sup>C</sup>  | 7  | 2 <sup>C</sup>  | 4  | NS                    |
| Feed distribution  | (n = 119)        |    | (n = 75)        |    | (n = 44)        |    |                       |
| Manual             | 109 <sup>A</sup> | 92 | 69 <sup>A</sup> | 92 | 40 <sup>A</sup> | 91 | NS                    |
| Automatic          | 10 <sup>B</sup>  | 8  | 6 <sup>B</sup>  | 8  | 4 <sup>B</sup>  | 9  | NS                    |
| Both               | 0 <sup>C</sup>   | 0  | 0 <sup>C</sup>  | 0  | 0 <sup>C</sup>  | 0  |                       |
| Silos              | (n = 97)         |    | (n = 66)        |    | (n = 31)        |    |                       |
| Yes                | 29 <sup>B</sup>  | 30 | 23 <sup>B</sup> | 35 | 6 <sup>B</sup>  | 19 | NS                    |
| No                 | 68 <sup>A</sup>  | 70 | 43 <sup>A</sup> | 65 | 25 <sup>A</sup> | 81 | NS                    |
| Nests              | (n = 119)        |    | (n = 75)        |    | (n = 44)        |    |                       |
| Yes                | 112 <sup>A</sup> | 94 | 69 <sup>A</sup> | 92 | 43 <sup>A</sup> | 98 | NS                    |
| No                 | 7 <sup>B</sup>   | 6  | 6 <sup>B</sup>  | 8  | 1 <sup>B</sup>  | 2  | NS                    |
| Nests              | (n = 104)        |    | (n = 64)        |    | (n = 40)        |    |                       |
| Single             | 27 <sup>B</sup>  | 26 | 15 <sup>B</sup> | 24 | 12 <sup>B</sup> | 30 | NS                    |
| Group              | 72 <sup>A</sup>  | 69 | 47 <sup>A</sup> | 73 | 25 <sup>A</sup> | 63 | NS                    |
| Both               | 5 <sup>C</sup>   | 5  | 2 <sup>C</sup>  | 3  | 3 <sup>C</sup>  | 7  | NS                    |

<sup>1</sup> Chi square test for a single variable between the two breeder categories, i.e. within row comparisons; significance levels: NS, non-significant ( $p > 0.05$ ). <sup>A-C</sup> Observations with different superscripts within the column are significantly different ( $\chi^2$ -test  $p < 0.01$ ).

**Table S6.** Self-production of feed primary materials: responses from all breeders and divided according to breeder category.

| Variable                                          | All Breeders      |    | Farmers           |    | Fancy Breeders    |    | $\chi^2$ <sup>1</sup> |
|---------------------------------------------------|-------------------|----|-------------------|----|-------------------|----|-----------------------|
|                                                   | n                 | %  | n                 | %  | n                 | %  |                       |
| Self-production of Primary Materials <sup>2</sup> | (n = 74)          |    | (n = 55)          |    | (n = 19)          |    |                       |
| Maize                                             | 65 <sup>A</sup>   | 88 | 49 <sup>A</sup>   | 89 | 16 <sup>a</sup>   | 84 | NS                    |
| Wheat                                             | 38 <sup>B</sup>   | 51 | 27 <sup>B</sup>   | 49 | 11 <sup>a,b</sup> | 58 | NS                    |
| Barley                                            | 33 <sup>B,C</sup> | 45 | 22 <sup>B,C</sup> | 40 | 11 <sup>a,b</sup> | 58 | NS                    |
| Bran                                              | 22 <sup>C</sup>   | 30 | 15 <sup>C</sup>   | 27 | 7 <sup>b</sup>    | 37 | NS                    |
| Soybean                                           | 24 <sup>C</sup>   | 32 | 14 <sup>C</sup>   | 25 | 10 <sup>a,b</sup> | 53 | *                     |
| Other                                             | 26 <sup>B,C</sup> | 35 | 18 <sup>,BC</sup> | 33 | 8 <sup>b</sup>    | 42 | NS                    |

<sup>1</sup> Chi square test for a single variable between the two breeder categories, i.e. within row comparisons; significance levels: \*  $p < 0.05$ ; NS, non-significant ( $p > 0.05$ ). <sup>A-C</sup> Observations with different superscripts within the column are significantly different ( $\chi^2$ -test  $p < 0.01$ ). <sup>a-b</sup> Observations with different superscripts within the column are significantly different ( $\chi^2$ -test,  $p < 0.05$ ).

**Table S7.** Flock vaccinations and medical treatments performed: responses from all breeders and divided according to breeder category.

| Variable                           | All Breeders    |     | Farmers         |     | Fancy Breeders  |     | $\chi^2$ <sup>1</sup> |
|------------------------------------|-----------------|-----|-----------------|-----|-----------------|-----|-----------------------|
|                                    | n               | %   | n               | %   | n               | %   |                       |
| Marek's Disease vaccination        | (n = 53)        |     | (n = 34)        |     | (n = 19)        |     |                       |
| Yes                                | 36 <sup>A</sup> | 68  | 25 <sup>A</sup> | 74  | 11              | 58  | NS                    |
| No                                 | 17 <sup>B</sup> | 32  | 9 <sup>B</sup>  | 26  | 8               | 42  | NS                    |
| Newcastle Disease vaccination      | (n=72)          |     | (n=41)          |     | (n=31)          |     |                       |
| Yes                                | 72 <sup>A</sup> | 100 | 41 <sup>A</sup> | 100 | 31 <sup>A</sup> | 100 | NS                    |
| No                                 | 0 <sup>B</sup>  | 0   | 0 <sup>B</sup>  | 0   | 0 <sup>B</sup>  | 0   | NS                    |
| Fowl Pox vaccination               | (n = 47)        |     | (n = 30)        |     | (n = 17)        |     |                       |
| Yes                                | 26              | 55  | 21 <sup>A</sup> | 70  | 5 <sup>b</sup>  | 29  | **                    |
| No                                 | 21              | 45  | 9 <sup>B</sup>  | 30  | 12 <sup>a</sup> | 71  | **                    |
| Infectious Bronchitis vaccination  | (n = 45)        |     | (n = 28)        |     | (n = 17)        |     |                       |
| Yes                                | 22              | 49  | 14              | 50  | 8               | 47  | NS                    |
| No                                 | 23              | 51  | 14              | 50  | 9               | 53  | NS                    |
| Infect. Bursal Disease vaccination | (n = 40)        |     | (n = 28)        |     | (n = 12)        |     |                       |
| Yes                                | 15 <sup>B</sup> | 38  | 14              | 50  | 1 <sup>B</sup>  | 8   | *                     |
| No                                 | 25 <sup>A</sup> | 62  | 14              | 50  | 11 <sup>A</sup> | 92  | *                     |
| Infectious Coriza vaccination      | (n=30)          |     | (n=17)          |     | (n=13)          |     |                       |
| Yes                                | 5 <sup>B</sup>  | 17  | 3 <sup>B</sup>  | 18  | 2 <sup>B</sup>  | 15  | NS                    |
| No                                 | 25 <sup>A</sup> | 83  | 14 <sup>A</sup> | 82  | 11 <sup>A</sup> | 85  | NS                    |
| Coccidiosis vaccination            | (n = 43)        |     | (n = 29)        |     | (n = 14)        |     |                       |
| Yes                                | 16 <sup>b</sup> | 37  | 14              | 48  | 2 <sup>B</sup>  | 14  | **                    |
| No                                 | 27 <sup>a</sup> | 63  | 15              | 52  | 12 <sup>A</sup> | 86  | NS                    |
| Coccidiosis treatment              | (n = 82)        |     | (n = 52)        |     | (n = 30)        |     |                       |
| Yes                                | 44              | 54  | 27              | 52  | 17              | 57  | NS                    |
| No                                 | 38              | 46  | 25              | 48  | 13              | 43  | NS                    |
| Worms treatment                    | (n = 96)        |     | (n = 61)        |     | (n = 35)        |     |                       |
| Yes                                | 37 <sup>B</sup> | 39  | 21 <sup>B</sup> | 34  | 16              | 46  | NS                    |
| No                                 | 59 <sup>A</sup> | 61  | 40 <sup>A</sup> | 66  | 19              | 54  | NS                    |
| Ectoparasites treatment            | (n = 58)        |     | (n = 36)        |     | (n = 22)        |     |                       |
| Yes                                | 38 <sup>A</sup> | 66  | 26 <sup>A</sup> | 72  | 12              | 55  | NS                    |
| No                                 | 20 <sup>B</sup> | 34  | 10 <sup>B</sup> | 28  | 10              | 45  | NS                    |

<sup>1</sup> Chi square test for a single variable between the two breeder categories, i.e. within row comparisons; significance levels: \*\*  $p < 0.01$ ; \*  $p < 0.05$ ; NS, non-significant ( $p > 0.05$ ). <sup>A-B</sup> Observations with different superscripts within the column are significantly different ( $\chi^2$ -test  $p < 0.01$ ). <sup>a-b</sup> Observations with different superscripts within the column are significantly different ( $\chi^2$ -test,  $p < 0.05$ ).

**Table S8.** Farm location and presence of a cold storage room for dead animals: responses from all breeders and divided according to breeder.

| Variable                         | All Breeders     |    | Farmers         |    | Fancy Breeders  |    | $\chi^2$ <sup>1</sup> |
|----------------------------------|------------------|----|-----------------|----|-----------------|----|-----------------------|
|                                  | n                | %  | n               | %  | n               | %  |                       |
| Near major roads                 | (n = 119)        |    | (n = 75)        |    | (n = 44)        |    |                       |
| Yes                              | 21 <sup>B</sup>  | 18 | 12 <sup>B</sup> | 16 | 9 <sup>B</sup>  | 20 | NS                    |
| No                               | 98 <sup>A</sup>  | 82 | 63 <sup>A</sup> | 84 | 35 <sup>A</sup> | 78 | NS                    |
| Near industrial areas            | (n = 118)        |    | (n=75)          |    | (n=43)          |    |                       |
| Yes                              | 10 <sup>B</sup>  | 8  | 5 <sup>B</sup>  | 67 | 5 <sup>B</sup>  | 12 | NS                    |
| No                               | 108 <sup>A</sup> | 92 | 70 <sup>A</sup> | 93 | 38 <sup>A</sup> | 88 | NS                    |
| Cold storage room for dead birds | (n = 110)        |    | (n = 74)        |    | (n = 36)        |    |                       |
| Yes                              | 36 <sup>B</sup>  | 33 | 32              | 43 | 4 <sup>B</sup>  | 11 | **                    |
| No                               | 74 <sup>A</sup>  | 67 | 42              | 57 | 32 <sup>A</sup> | 89 | NS                    |

<sup>1</sup> Chi square test for a single variable between the two breeder categories, i.e. within row comparisons; significance levels: \*\*  $p < 0.01$ ; NS, non-significant ( $p > 0.05$ ). <sup>A-B</sup> Observations with different superscripts within the column are significantly different ( $\chi^2$ -test  $p < 0.01$ ).

**Table S9.** Frequency of interventions against rodents: responses from all breeders and divided according to breeder category.

| Variable                                   | All Breeders     |    | Farmers          |    | Fancy Breeders |    | $\chi^2$ <sup>1</sup> |
|--------------------------------------------|------------------|----|------------------|----|----------------|----|-----------------------|
|                                            | n                | %  | n                | %  | n              | %  |                       |
| Intervention frequency in feed store-room  | (n = 33)         |    | (n = 26)         |    | (n = 7)        |    |                       |
| At least every 15 days                     | 6 <sup>a,b</sup> | 18 | 4 <sup>b</sup>   | 15 | 2              | 29 | NS                    |
| Every 15–30 days                           | 4 <sup>b</sup>   | 12 | 3 <sup>b</sup>   | 12 | 1              | 14 | NS                    |
| Every 30–60 days                           | 14 <sup>a</sup>  | 43 | 12 <sup>a</sup>  | 46 | 2              | 29 | NS                    |
| < than every 60 days                       | 9 <sup>a,b</sup> | 27 | 7 <sup>a,b</sup> | 27 | 2              | 28 | NS                    |
| Intervention frequency in the chicken shed | (n = 29)         |    | (n = 21)         |    | (n = 8)        |    |                       |
| At least every 15 days                     | 5                | 17 | 3 <sup>b</sup>   | 14 | 2              | 25 | NS                    |
| Every 15–30 days                           | 4                | 14 | 3 <sup>b</sup>   | 14 | 1              | 12 | NS                    |
| Every 30–60 days                           | 12               | 41 | 10 <sup>a</sup>  | 48 | 2              | 25 | NS                    |
| < than every 60 days                       | 8                | 28 | 5 <sup>a,b</sup> | 24 | 3              | 38 | NS                    |

<sup>1</sup> Chi square test for a single variable between the two breeder categories, i.e. within row comparisons; significance levels: NS, non-significant ( $p > 0.05$ ). <sup>a-b</sup> Observations with different superscripts within the column are significantly different ( $\chi^2$ -test,  $p < 0.05$ ).
